# Supplementary material
Source: PubMed Central journal article supplement (PMC8513400)
Supplement: ciab728_suppl_Supplementary_Materials.pdf [file ciab728_suppl_Supplementary_Materials.pdf]

Supplementary Table 1. Unit cost of remdesivir medication and healthcare services

| Medication / Health Service                                   | Cost (HK\$) | Cost (US\$) <sup>†</sup> |
|---------------------------------------------------------------|-------------|--------------------------|
| Remdesivir, per vial                                          | 3,042       | 390                      |
| Dexamethasone, per 10 days                                    | 94          | 12                       |
| Hospitalization, per day                                      |             |                          |
| General Ward                                                  | 5,100       | 654                      |
| Intensive Care Unit                                           | 24,400      | 3,128                    |
| Emergency department, per visit                               | 1,230       | 158                      |
| Polymerase chain reaction tests                               | 240         | 31                       |
| Extracorporeal membrane oxygenation (ECMO) catheter insertion | 52,100      | 6,679                    |
| ECMO                                                          | 80,175      | 10,279                   |
| Tracheostomy                                                  | 16,050      | 2,058                    |
| Hemodialysis                                                  | 9,410       | 1,206                    |
| Peritoneal dialysis                                           | 9,410       | 1,206                    |

Data sources:

Gilead Sciences I. An Open Letter from Daniel O’Day, Chairman & CEO, Gilead Sciences. Available at: <https://www.gilead.com/news-and-press/press-room/press-releases/2020/6/an-open-letter-from-daniel-oday-chairman--ceo-gilead-sciences>. Accessed 28/05/2021.

Hospital Authority. Hospital Authority Ordinance (Chapter 113) - Revision to list of charges, 2017.

Notes:

ECMO = extracorporeal membrane oxygenation

<sup>†</sup> A fixed exchange rate of 1 US\$ = 7.8 HK\$

Supplementary Table 2. Data completion rates of baseline characteristics before multiple imputation

| Characteristics                                       | Total<br>(N = 1,544) | Remdesivir-<br>Dexamethasone<br>(N=466) | Dexamethasone<br>(N=1,078) |
|-------------------------------------------------------|----------------------|-----------------------------------------|----------------------------|
| Age                                                   | 100.0% (1,544)       | 100.0% (466)                            | 100.0% (1,078)             |
| Sex                                                   | 100.0% (1,544)       | 100.0% (466)                            | 100.0% (1,078)             |
| Period                                                | 100.0% (1,544)       | 100.0% (466)                            | 100.0% (1,078)             |
| Pre-existing comorbidities on admission               |                      |                                         |                            |
| Charlson Comorbidity Index                            | 100.0% (1,544)       | 100.0% (466)                            | 100.0% (1,078)             |
| Diabetes mellitus                                     | 100.0% (1,544)       | 100.0% (466)                            | 100.0% (1,078)             |
| Hypertension                                          | 100.0% (1,544)       | 100.0% (466)                            | 100.0% (1,078)             |
| Liver disease                                         | 100.0% (1,544)       | 100.0% (466)                            | 100.0% (1,078)             |
| Chronic lung disease                                  | 100.0% (1,544)       | 100.0% (466)                            | 100.0% (1,078)             |
| Chronic heart disease                                 | 100.0% (1,544)       | 100.0% (466)                            | 100.0% (1,078)             |
| Chronic kidney disease                                | 100.0% (1,544)       | 100.0% (466)                            | 100.0% (1,078)             |
| Malignancy                                            | 100.0% (1,544)       | 100.0% (466)                            | 100.0% (1,078)             |
| Long-term medications                                 |                      |                                         |                            |
| ACEI or ARB                                           | 100.0% (1,544)       | 100.0% (466)                            | 100.0% (1,078)             |
| Anticoagulant                                         | 100.0% (1,544)       | 100.0% (466)                            | 100.0% (1,078)             |
| Antiplatelet                                          | 100.0% (1,544)       | 100.0% (466)                            | 100.0% (1,078)             |
| Lipid-lowering agent                                  | 100.0% (1,544)       | 100.0% (466)                            | 100.0% (1,078)             |
| NSAID                                                 | 100.0% (1,544)       | 100.0% (466)                            | 100.0% (1,078)             |
| Time from admission to remdesivir initiation, days    | 100.0% (1,544)       | 100.0% (466)                            | 100.0% (1,078)             |
| Cumulative dosage of remdesivir, mg                   | 100.0% (1,544)       | 100.0% (466)                            | 100.0% (1,078)             |
| Duration of use of remdesivir, days                   | 100.0% (1,544)       | 100.0% (466)                            | 100.0% (1,078)             |
| Time from admission to dexamethasone initiation, days | 100.0% (1,544)       | 100.0% (466)                            | 100.0% (1,078)             |
| Administration route of dexamethasone                 | 100.0% (1,544)       | 100.0% (466)                            | 100.0% (1,078)             |
| Dosage of dexamethasone                               | 100.0% (1,544)       | 100.0% (466)                            | 100.0% (1,078)             |
| Cumulative dosage of dexamethasone, mg                | 100.0% (1,544)       | 100.0% (466)                            | 100.0% (1,078)             |
| Duration of use of dexamethasone, days                | 100.0% (1,544)       | 100.0% (466)                            | 100.0% (1,078)             |
| Treatment performed prior to dexamethasone initiation |                      |                                         |                            |
| Remdesivir                                            | 100.0% (1,544)       | 100.0% (466)                            | 100.0% (1,078)             |
| Interferon- $\beta$ -1b                               | 100.0% (1,544)       | 100.0% (466)                            | 100.0% (1,078)             |
| Ribavirin                                             | 100.0% (1,544)       | 100.0% (466)                            | 100.0% (1,078)             |
| Tocilizumab                                           | 100.0% (1,544)       | 100.0% (466)                            | 100.0% (1,078)             |
| Baricitinib                                           | 100.0% (1,544)       | 100.0% (466)                            | 100.0% (1,078)             |
| Other systemic steroids                               | 100.0% (1,544)       | 100.0% (466)                            | 100.0% (1,078)             |
| Drug initiation sequence                              | 100.0% (1,544)       | 100.0% (466)                            | 100.0% (1,078)             |
| ECMO                                                  | 100.0% (1,544)       | 100.0% (466)                            | 100.0% (1,078)             |
| Invasive mechanical ventilation                       | 100.0% (1,544)       | 100.0% (466)                            | 100.0% (1,078)             |
| Non-invasive mechanical ventilation                   | 100.0% (1,544)       | 100.0% (466)                            | 100.0% (1,078)             |
| Dialysis                                              | 100.0% (1,544)       | 100.0% (466)                            | 100.0% (1,078)             |

|                                             |                |              |                |
|---------------------------------------------|----------------|--------------|----------------|
| ICU admission                               | 100.0% (1,544) | 100.0% (466) | 100.0% (1,078) |
| Admission via emergency department          | 100.0% (1,544) | 100.0% (466) | 100.0% (1,078) |
| WHO Clinical Progression Scale on admission | 100.0% (1,544) | 100.0% (466) | 100.0% (1,078) |
| Laboratory parameters on admission          |                |              |                |
| White blood cell                            | 99.5% (1,537)  | 99.6% (464)  | 99.5% (1,073)  |
| Neutrophil                                  | 99.4% (1,535)  | 99.6% (464)  | 99.4% (1,071)  |
| Lymphocyte                                  | 99.4% (1,535)  | 99.6% (464)  | 99.4% (1,071)  |
| Platelet                                    | 99.5% (1,536)  | 99.6% (464)  | 99.4% (1,072)  |
| Lactate dehydrogenase                       | 98.2% (1,516)  | 98.9% (461)  | 97.9% (1,055)  |
| Creatine kinase                             | 87.6% (1,352)  | 91.0% (424)  | 86.1% (928)    |
| Total bilirubin                             | 99.7% (1,539)  | 100.0% (466) | 99.5% (1,073)  |
| C-reactive protein                          | 98.9% (1,527)  | 99.8% (465)  | 98.5% (1,062)  |
| Cycle threshold value                       | 97.3% (1,502)  | 99.4% (463)  | 96.4% (1,039)  |
| eGFR                                        | 99.8% (1,541)  | 100.0% (466) | 99.7% (1,075)  |
| ALP                                         | 98.1% (1,515)  | 98.3% (458)  | 98.1% (1,057)  |
| ALT                                         | 99.7% (1,539)  | 100.0% (466) | 99.5% (1,073)  |
| Hemoglobin                                  | 99.5% (1,537)  | 99.6% (464)  | 99.5% (1,073)  |

---

Notes: ACEI = angiotensin converting enzyme inhibitor; ALP = alkaline phosphatase; ALT = alanine transaminase; ARB = angiotensin receptor blocker; ECMO = extracorporeal membrane oxygenation; eGFR = estimated glomerular filtration rate; ICU = intensive care unit; NSAID = non-steroidal anti-inflammatory drug

Supplementary Table 3. Baseline characteristics of hospitalized patients with COVID-19 who initiated remdesivir prior to, on the same day, or later than dexamethasone initiation, and those who had not initiated remdesivir

| Baseline characteristics               | Remdesivir prior to dexamethasone (n=93) |         | Co-initiating remdesivir and dexamethasone on the same day (n=373) |         | Remdesivir later than dexamethasone (n=149) |         | Non-remdesivir users (n=929) |         |
|----------------------------------------|------------------------------------------|---------|--------------------------------------------------------------------|---------|---------------------------------------------|---------|------------------------------|---------|
|                                        | N / Mean                                 | % / SD  | N / Mean                                                           | % / SD  | N / Mean                                    | % / SD  | N / Mean                     | % / SD  |
| Age, years †                           | 66.1                                     | 12.2    | 64.5                                                               | 12.6    | 65.6                                        | 13.6    | 64.1                         | 14.6    |
| ≤65                                    | 46                                       | (49.5%) | 180                                                                | (48.3%) | 76                                          | (51.0%) | 501                          | (53.9%) |
| >65                                    | 47                                       | (50.5%) | 193                                                                | (51.7%) | 73                                          | (49.0%) | 428                          | (46.1%) |
| Sex                                    |                                          |         |                                                                    |         |                                             |         |                              |         |
| Male                                   | 57                                       | (61.3%) | 207                                                                | (55.5%) | 91                                          | (61.1%) | 537                          | (57.8%) |
| Female                                 | 36                                       | (38.7%) | 166                                                                | (44.5%) | 58                                          | (38.9%) | 392                          | (42.2%) |
| Period                                 |                                          |         |                                                                    |         |                                             |         |                              |         |
| 21st January 2020 - 30th November 2020 | 17                                       | (18.3%) | 47                                                                 | (12.6%) | 59                                          | (39.6%) | 658                          | (70.8%) |
| 1st December 2020 - 31st January 2021  | 76                                       | (81.7%) | 326                                                                | (87.4%) | 90                                          | (60.4%) | 271                          | (29.2%) |
| Pre-existing comorbidities             |                                          |         |                                                                    |         |                                             |         |                              |         |
| Charlson Comorbidity Index †‡          | 4.7                                      | 1.9     | 4.7                                                                | 2.0     | 5.0                                         | 2.1     | 4.9                          | 2.3     |
| 1-4                                    | 50                                       | (53.8%) | 187                                                                | (50.1%) | 64                                          | (43.0%) | 459                          | (49.5%) |
| 5-6                                    | 28                                       | (30.1%) | 128                                                                | (34.3%) | 54                                          | (36.2%) | 278                          | (30.0%) |
| 7-14                                   | 15                                       | (16.1%) | 58                                                                 | (15.6%) | 31                                          | (20.8%) | 191                          | (20.6%) |
| Diabetes mellitus                      | 37                                       | (39.8%) | 157                                                                | (42.1%) | 73                                          | (49.0%) | 328                          | (35.3%) |
| Hypertension                           | 55                                       | (59.1%) | 240                                                                | (64.3%) | 104                                         | (69.8%) | 511                          | (55.0%) |
| Liver disease                          | 6                                        | (6.5%)  | 50                                                                 | (13.4%) | 20                                          | (13.4%) | 114                          | (12.3%) |
| Chronic lung disease                   | 10                                       | (10.8%) | 47                                                                 | (12.6%) | 21                                          | (14.1%) | 105                          | (11.3%) |
| Chronic heart disease                  | 15                                       | (16.1%) | 45                                                                 | (12.1%) | 23                                          | (15.4%) | 177                          | (19.1%) |
| Chronic kidney disease                 | 5                                        | (5.4%)  | 41                                                                 | (11.0%) | 22                                          | (14.8%) | 187                          | (20.1%) |
| Malignancy                             | 2                                        | (2.2%)  | 9                                                                  | (2.4%)  | 6                                           | (4.0%)  | 26                           | (2.8%)  |
| Long-term medications                  |                                          |         |                                                                    |         |                                             |         |                              |         |
| ACEI/ARB                               | 28                                       | (30.1%) | 115                                                                | (30.8%) | 54                                          | (36.2%) | 230                          | (24.8%) |
| Anticoagulant                          | 41                                       | (44.1%) | 215                                                                | (57.6%) | 111                                         | (74.5%) | 360                          | (38.8%) |
| Antiplatelet                           | 15                                       | (16.1%) | 63                                                                 | (16.9%) | 26                                          | (17.4%) | 174                          | (18.7%) |

|                                                                     |       |          |       |          |       |         |      |         |
|---------------------------------------------------------------------|-------|----------|-------|----------|-------|---------|------|---------|
| Lipid-lowering agent                                                | 36    | (38.7%)  | 135   | (36.2%)  | 68    | (45.6%) | 283  | (30.5%) |
| NSAID                                                               | 16    | (17.2%)  | 73    | (19.6%)  | 35    | (23.5%) | 209  | (22.5%) |
| Time from admission to remdesivir initiation, days †                | 3.2   | 3.2      | 3.7   | 3.2      | 6.0   | 3.7     | NA   | NA      |
| Cumulative dosage of remdesivir, mg †                               | 543.0 | 241.6    | 609.1 | 232.7    | 604.7 | 219.1   | NA   | NA      |
| Duration of use of remdesivir, days †                               | 3.7   | 2.1      | 4.4   | 2.0      | 4.5   | 1.9     | NA   | NA      |
| Time from admission to dexamethasone initiation, days †             | 5.8   | 3.9      | 3.7   | 3.2      | 3.3   | 2.9     | 4.7  | 4.2     |
| Administration route of dexamethasone                               |       |          |       |          |       |         |      |         |
| Oral                                                                | 17    | (18.3%)  | 47    | (12.6%)  | 43    | (28.9%) | 240  | (25.8%) |
| Intravenous injection                                               | 76    | (81.7%)  | 326   | (87.4%)  | 106   | (71.1%) | 689  | (74.2%) |
| Dosage of dexamethasone                                             |       |          |       |          |       |         |      |         |
| Up to 6mg daily                                                     | 39    | (41.9%)  | 146   | (39.1%)  | 58    | (38.9%) | 460  | (49.5%) |
| More than 6mg daily                                                 | 54    | (58.1%)  | 227   | (60.9%)  | 91    | (61.1%) | 469  | (50.5%) |
| Cumulative dosage of dexamethasone, mg †                            | 37.6  | 35.3     | 55.0  | 74.1     | 73.2  | 57.7    | 49.8 | 50.1    |
| Duration of use of dexamethasone, days †                            | 5.2   | 5.3      | 7.9   | 11.0     | 10.4  | 8.2     | 8.0  | 8.2     |
| Treatment performed prior to dexamethasone initiation               |       |          |       |          |       |         |      |         |
| Remdesivir                                                          | 93    | (100.0%) | 373   | (100.0%) | 0     | (0.0%)  | NA   | NA      |
| Interferon-β-1b                                                     | 64    | (68.8%)  | 191   | (51.2%)  | 118   | (79.2%) | 761  | (81.9%) |
| Ribavirin                                                           | 30    | (32.3%)  | 109   | (29.2%)  | 75    | (50.3%) | 368  | (39.6%) |
| Tocilizumab                                                         | 0     | (0.0%)   | 2     | (0.5%)   | 3     | (2.0%)  | 22   | (2.4%)  |
| Baricitinib                                                         | 1     | (1.1%)   | 4     | (1.1%)   | 1     | (0.7%)  | 3    | (0.3%)  |
| Other systemic steroids                                             | 2     | (2.2%)   | 10    | (2.7%)   | 4     | (2.7%)  | 41   | (4.4%)  |
| ECMO                                                                | 0     | (0.0%)   | 1     | (0.3%)   | 1     | (0.7%)  | 1    | (0.1%)  |
| Invasive mechanical ventilation                                     | 6     | (6.5%)   | 57    | (15.3%)  | 43    | (28.9%) | 85   | (9.1%)  |
| Non-invasive mechanical ventilation                                 | 0     | (0.0%)   | 13    | (3.5%)   | 11    | (7.4%)  | 21   | (2.3%)  |
| Dialysis                                                            | 0     | (0.0%)   | 4     | (1.1%)   | 1     | (0.7%)  | 10   | (1.1%)  |
| ICU admission                                                       | 16    | (17.2%)  | 96    | (25.7%)  | 63    | (42.3%) | 149  | (16.0%) |
| Admission via emergency department                                  | 29    | (31.2%)  | 167   | (44.8%)  | 84    | (56.4%) | 586  | (63.1%) |
| WHO Clinical Progression Scale Score (range 0-10) †                 | 4.5   | 0.9      | 4.8   | 1.1      | 5.2   | 1.0     | 4.5  | 0.9     |
| ARDS                                                                | 0     | (0.0%)   | 25    | (6.7%)   | 9     | (6.0%)  | 29   | (3.1%)  |
| Laboratory parameters [normal range] †                              |       |          |       |          |       |         |      |         |
| White blood cell, ×10 <sup>9</sup> /L [3.7-9.2 ×10 <sup>9</sup> /L] | 5.5   | 1.9      | 5.8   | 2.5      | 5.7   | 2.6     | 5.7  | 2.5     |
| Neutrophil, ×10 <sup>9</sup> /L [1.7-5.8 ×10 <sup>9</sup> /L]       | 4.0   | 2.1      | 4.3   | 2.4      | 4.1   | 2.5     | 4.2  | 2.4     |

|                                                                     |       |       |       |       |       |       |       |       |
|---------------------------------------------------------------------|-------|-------|-------|-------|-------|-------|-------|-------|
| Lymphocyte, $\times 10^9/L$ [1.0-3.1 $\times 10^9/L$ ]              | 1.0   | 0.5   | 1.0   | 0.5   | 1.0   | 0.4   | 1.0   | 0.4   |
| Platelet, $\times 10^9/L$ [145-370 $\times 10^9/L$ ]                | 176.0 | 59.8  | 183.2 | 61.4  | 163.5 | 46.3  | 189.2 | 75.8  |
| Lactate dehydrogenase, U/L [110-210 U/L]                            | 318.6 | 98.5  | 338.0 | 146.8 | 326.4 | 139.1 | 317.8 | 142.5 |
| Creatine kinase, U/L [26-192 U/L]                                   | 189.0 | 239.8 | 294.2 | 499.2 | 363.2 | 522.4 | 236.2 | 513.6 |
| Total bilirubin, $\mu\text{mol/L}$ [5-27 $\mu\text{mol/L}$ ]        | 9.9   | 6.4   | 9.4   | 6.7   | 9.4   | 4.3   | 10.1  | 7.5   |
| C-reactive protein, mg/L [ $<5$ mg/L]                               | 55.9  | 48.8  | 65.1  | 55.3  | 63.2  | 59.9  | 58.2  | 54.7  |
| Cycle threshold value, cycle                                        | 22.4  | 5.7   | 23.3  | 4.9   | 22.4  | 5.0   | 25.0  | 5.5   |
| eGFR, ml/min/1.73m <sup>2</sup> [ $>90$ ml/min/1.73m <sup>2</sup> ] | 102.6 | 67.4  | 105.1 | 57.3  | 104.3 | 84.8  | 102.9 | 60.7  |
| ALP, U/L [30-120 U/L]                                               | 67.4  | 25.8  | 69.3  | 34.1  | 70.2  | 33.2  | 74.4  | 59.1  |
| ALT, U/L [ $<46.5$ U/L]                                             | 33.8  | 23.9  | 38.2  | 25.7  | 34.4  | 20.7  | 39.8  | 43.0  |
| Hemoglobin, g/dL [13.4-17.1 g/dL]                                   | 13.3  | 1.8   | 13.3  | 1.5   | 13.4  | 1.8   | 13.2  | 1.8   |

Notes:

ACEI = angiotensin converting enzyme inhibitor; ALP = alkaline phosphatase; ALT = alanine transaminase; ARB = angiotensin receptor blocker; ARDS = acute respiratory distress syndrome; ECMO = extracorporeal membrane oxygenation; eGFR = estimated glomerular filtration rate; ICU = intensive care unit; NSAID = non-steroidal anti-inflammatory drug; SD = standard deviation

† Age, Charlson Comorbidity Index, clinical severity, cumulative dosage, duration of use of dosage, time from admission to dexamethasone initiation, and laboratory parameters on admission are presented in mean  $\pm$  SD

‡ The calculation of Charlson Comorbidity Index does not include Acquired Immune Deficiency Syndrome (AIDS)

Supplementary Table 4. Number and incidence rate of outcome events

| Event                                                                                                   | Before weighting       |        |                                                    |                  |                 |                                          |                                        | After weighting                              |                  |
|---------------------------------------------------------------------------------------------------------|------------------------|--------|----------------------------------------------------|------------------|-----------------|------------------------------------------|----------------------------------------|----------------------------------------------|------------------|
|                                                                                                         | Cumulative incidence   |        | Crude incidence rate<br>(Events / 100 person-days) |                  |                 | Median<br>follow-up<br>periods<br>(Days) | Mean<br>follow-up<br>periods<br>(Days) | Incidence rate<br>(Events / 100 person-days) |                  |
|                                                                                                         | Cases<br>with<br>event | Rate   | Estimate                                           | 95% CI*          | Person-<br>days |                                          |                                        | Estimate                                     | 95% CI*          |
| <b>Total (N = 1544)</b>                                                                                 |                        |        |                                                    |                  |                 |                                          |                                        |                                              |                  |
| Clinical improvement on WHO clinical progression scale by $\geq 1$ score                                | 1379                   | 0.8931 | 4.267                                              | (4.045, 4.498)   | 32317           | 13                                       | 21                                     | 4.583                                        | (4.416, 4.754)   |
| Hospital discharge (score $\leq 3$ )                                                                    | 1361                   | 0.8815 | 3.991                                              | (3.781, 4.208)   | 34105           | 13                                       | 22                                     | 4.213                                        | (4.058, 4.371)   |
| Recovery (score $\leq 4$ )                                                                              | 376                    | 0.7596 | 2.199                                              | (1.983, 2.433)   | 17097           | 23                                       | 35                                     | 2.212                                        | (2.053, 2.378)   |
| In-hospital death or invasive mechanical ventilation (score $\geq 7$ )                                  | 264                    | 0.1752 | 1.067                                              | (0.942, 1.204)   | 24736           | 12                                       | 16                                     | 0.921                                        | (0.838, 1.010)   |
| In-hospital death or invasive mechanical ventilation (score $\geq 7$ ) or intensive care unit admission | 224                    | 0.1563 | 0.965                                              | (0.843, 1.100)   | 23212           | 12                                       | 16                                     | 0.837                                        | (0.755, 0.925)   |
| In-hospital death (score = 10)                                                                          | 161                    | 0.1043 | 0.472                                              | (0.402, 0.551)   | 34105           | 13                                       | 22                                     | 0.414                                        | (0.366, 0.465)   |
| Viral clearance (first negative PCR result)                                                             | 479                    | 0.3195 | 2.015                                              | (1.839, 2.204)   | 23768           | 12                                       | 16                                     | 2.132                                        | (2.003, 2.267)   |
| Low viral load (Ct value $\geq 35$ )                                                                    | 465                    | 0.3121 | 1.936                                              | (1.764, 2.120)   | 24020           | 11                                       | 16                                     | 2.018                                        | (1.892, 2.149)   |
| IgG antibody                                                                                            | 1068                   | 0.9328 | 12.710                                             | (11.959, 13.495) | 8403            | 6                                        | 7                                      | 12.904                                       | (12.364, 13.460) |
| ARDS                                                                                                    | 132                    | 0.0891 | 0.494                                              | (0.414, 0.586)   | 26695           | 12                                       | 18                                     | 0.501                                        | (0.442, 0.565)   |
| <b>Remdesivir-Dexamethasone (N = 466)</b>                                                               |                        |        |                                                    |                  |                 |                                          |                                        |                                              |                  |
| Clinical improvement on WHO clinical progression scale by $\geq 1$ score                                | 429                    | 0.9206 | 4.755                                              | (4.315, 5.226)   | 9023            | 12                                       | 19                                     | 5.204                                        | (4.938, 5.476)   |
| Hospital discharge (score $\leq 3$ )                                                                    | 422                    | 0.9056 | 4.230                                              | (3.836, 4.653)   | 9977            | 13                                       | 21                                     | 4.616                                        | (4.381, 4.861)   |
| Recovery (score $\leq 4$ )                                                                              | 122                    | 0.7922 | 2.216                                              | (1.840, 2.646)   | 5506            | 27                                       | 36                                     | 2.232                                        | (2.001, 2.481)   |
| In-hospital death or invasive mechanical ventilation (score $\geq 7$ )                                  | 65                     | 0.1451 | 0.916                                              | (0.707, 1.168)   | 7093            | 11                                       | 16                                     | 0.741                                        | (0.630, 0.860)   |
| In-hospital death or invasive mechanical ventilation (score $\geq 7$ ) or intensive care unit admission | 47                     | 0.1127 | 0.736                                              | (0.541, 0.979)   | 6384            | 11                                       | 15                                     | 0.657                                        | (0.550, 0.775)   |
| In-hospital death (score = 10)                                                                          | 36                     | 0.0773 | 0.361                                              | (0.253, 0.500)   | 9977            | 13                                       | 21                                     | 0.309                                        | (0.250, 0.377)   |
| Viral clearance (first negative PCR result)                                                             | 149                    | 0.3268 | 2.041                                              | (1.726, 2.396)   | 7302            | 12                                       | 16                                     | 2.438                                        | (2.239, 2.650)   |
| Low viral load (Ct value $\geq 35$ )                                                                    | 143                    | 0.3129 | 1.997                                              | (1.683, 2.353)   | 7160            | 11                                       | 16                                     | 2.226                                        | (2.035, 2.428)   |
| IgG antibody                                                                                            | 329                    | 0.9705 | 14.218                                             | (12.723, 15.840) | 2314            | 5                                        | 7                                      | 13.814                                       | (13.000, 14.660) |
| ARDS                                                                                                    | 47                     | 0.1066 | 0.616                                              | (0.452, 0.819)   | 7635            | 11                                       | 17                                     | 0.510                                        | (0.424, 0.607)   |

**Dexamethasone (N = 1078)**

|                                                                                                         |     |        |        |                  |       |    |    |        |                  |
|---------------------------------------------------------------------------------------------------------|-----|--------|--------|------------------|-------|----|----|--------|------------------|
| Clinical improvement on WHO clinical progression scale by $\geq 1$ score                                | 950 | 0.8813 | 4.078  | (3.823, 4.346)   | 23294 | 13 | 22 | 4.073  | (3.861, 4.292)   |
| Hospital discharge (score $\leq 3$ )                                                                    | 939 | 0.8711 | 3.892  | (3.647, 4.149)   | 24128 | 13 | 22 | 3.859  | (3.656, 4.067)   |
| Recovery (score $\leq 4$ )                                                                              | 254 | 0.7449 | 2.191  | (1.930, 2.478)   | 11591 | 22 | 34 | 2.195  | (1.980, 2.425)   |
| In-hospital death or invasive mechanical ventilation (score $\geq 7$ )                                  | 199 | 0.1879 | 1.128  | (0.977, 1.296)   | 17643 | 12 | 17 | 1.074  | (0.952, 1.205)   |
| In-hospital death or invasive mechanical ventilation (score $\geq 7$ ) or intensive care unit admission | 177 | 0.1742 | 1.052  | (0.903, 1.219)   | 16828 | 12 | 17 | 0.988  | (0.867, 1.117)   |
| In-hospital death (score = 10)                                                                          | 125 | 0.1160 | 0.518  | (0.431, 0.617)   | 24128 | 13 | 22 | 0.506  | (0.434, 0.585)   |
| Viral clearance (first negative PCR result)                                                             | 330 | 0.3164 | 2.004  | (1.794, 2.232)   | 16466 | 12 | 16 | 1.856  | (1.691, 2.032)   |
| Low viral load (Ct value $\geq 35$ )                                                                    | 322 | 0.3117 | 1.910  | (1.707, 2.130)   | 16860 | 12 | 16 | 1.830  | (1.666, 2.005)   |
| IgG antibody                                                                                            | 739 | 0.9169 | 12.137 | (11.277, 13.044) | 6089  | 6  | 8  | 12.100 | (11.382, 12.841) |
| ARDS                                                                                                    | 85  | 0.0817 | 0.446  | (0.356, 0.551)   | 19060 | 12 | 18 | 0.493  | (0.413, 0.581)   |

Notes: ARDS = acute respiratory distress syndrome; CI = confidence interval; Ct = cycle threshold; IgG = immunoglobulin G; PCR = polymerase chain reaction

\* 95% CI of incidence rates were constructed by Poisson distribution



Supplementary Table 5. Sensitivity analyses on the study outcomes

|                                                                                                                          | Before weighting         |               | After weighting                           |              |         |
|--------------------------------------------------------------------------------------------------------------------------|--------------------------|---------------|-------------------------------------------|--------------|---------|
|                                                                                                                          | Remdesivir-Dexamethasone | Dexamethasone | Remdesivir-Dexamethasone vs Dexamethasone |              |         |
|                                                                                                                          | % (N)                    | % (N)         | HR†                                       | 95% CI       | P-value |
| <b>Clinical improvement on WHO clinical progression scale by <math>\geq 1</math> score</b>                               |                          |               |                                           |              |         |
| Removing hospital discharge as censoring criteria                                                                        | 92.1% (466)              | 77.1% (1,078) | 1.23                                      | (1.02, 1.48) | 0.030   |
| At most 90 days of follow-up period                                                                                      | 91.4% (466)              | 86.1% (1,078) | 1.23                                      | (1.02, 1.49) | 0.030   |
| Perform complete-case using the IPTW                                                                                     | 92.3% (413)              | 88.4% (872)   | 1.21                                      | (1.06, 1.37) | 0.004   |
| <b>Hospital discharge (score <math>\leq 3</math>)</b>                                                                    |                          |               |                                           |              |         |
| Removing hospital discharge as censoring criteria                                                                        | 90.6% (466)              | 76.0% (1,078) | 1.20                                      | (1.00, 1.45) | 0.053   |
| At most 90 days of follow-up period                                                                                      | 89.5% (466)              | 84.9% (1,078) | 1.18                                      | (0.97, 1.44) | 0.090   |
| Perform complete-case using the IPTW                                                                                     | 90.6% (413)              | 87.2% (872)   | 1.16                                      | (1.02, 1.33) | 0.025   |
| <b>Recovery (score <math>\leq 4</math>)</b>                                                                              |                          |               |                                           |              |         |
| Removing hospital discharge as censoring criteria                                                                        | 79.2% (154)              | 55.7% (341)   | 1.05                                      | (0.79, 1.40) | 0.734   |
| At most 90 days of follow-up period                                                                                      | 76.6% (154)              | 69.5% (341)   | 0.93                                      | (0.71, 1.22) | 0.594   |
| Perform complete-case using the IPTW                                                                                     | 78.0% (127)              | 75.1% (293)   | 0.96                                      | (0.77, 1.20) | 0.734   |
| <b>Viral clearance (first negative PCR result)</b>                                                                       |                          |               |                                           |              |         |
| Removing hospital discharge as censoring criteria                                                                        | 32.7% (456)              | 26.0% (1,043) | 1.35                                      | (0.95, 1.92) | 0.093   |
| At most 90 days of follow-up period                                                                                      | 32.7% (456)              | 31.5% (1,043) | 1.29                                      | (0.93, 1.79) | 0.126   |
| Perform complete-case using the IPTW                                                                                     | 32.2% (404)              | 30.5% (846)   | 1.17                                      | (0.93, 1.48) | 0.172   |
| <b>Low viral load (Ct value <math>\geq 35</math>)</b>                                                                    |                          |               |                                           |              |         |
| Removing hospital discharge as censoring criteria                                                                        | 31.3% (457)              | 25.6% (1,033) | 1.26                                      | (0.89, 1.81) | 0.195   |
| At most 90 days of follow-up period                                                                                      | 31.3% (457)              | 31.1% (1,033) | 1.25                                      | (0.91, 1.72) | 0.172   |
| Perform complete-case using the IPTW                                                                                     | 30.9% (404)              | 31.9% (839)   | 1.24                                      | (0.98, 1.56) | 0.075   |
| <b>IgG antibody</b>                                                                                                      |                          |               |                                           |              |         |
| Removing hospital discharge as censoring criteria                                                                        | 97.1% (339)              | 79.4% (806)   | 1.26                                      | (1.04, 1.51) | 0.016   |
| At most 90 days of follow-up period                                                                                      | 97.1% (339)              | 91.7% (806)   | 1.22                                      | (1.02, 1.46) | 0.029   |
| Perform complete-case using the IPTW                                                                                     | 97.2% (288)              | 92.6% (651)   | 1.46                                      | (1.26, 1.69) | <0.001  |
| <b>In-hospital death or invasive mechanical ventilation (score <math>\geq 7</math>)</b>                                  |                          |               |                                           |              |         |
| Removing hospital discharge as censoring criteria                                                                        | 14.5% (448)              | 15.9% (1,059) | 0.65                                      | (0.42, 1.00) | 0.050   |
| At most 90 days of follow-up period                                                                                      | 14.5% (448)              | 18.7% (1,059) | 0.67                                      | (0.46, 0.97) | 0.032   |
| Perform complete-case using the IPTW                                                                                     | 13.5% (399)              | 19.4% (854)   | 0.69                                      | (0.51, 0.94) | 0.018   |
| <b>In-hospital death or invasive mechanical ventilation (score <math>\geq 7</math>) or intensive care unit admission</b> |                          |               |                                           |              |         |
| Removing hospital discharge as censoring criteria                                                                        | 11.3% (417)              | 15.0% (1,016) | 0.61                                      | (0.38, 1.00) | 0.048   |
| At most 90 days of follow-up period                                                                                      | 11.3% (417)              | 17.3% (1,016) | 0.64                                      | (0.43, 0.97) | 0.035   |
| Perform complete-case using the IPTW                                                                                     | 10.2% (372)              | 17.9% (814)   | 0.59                                      | (0.41, 0.84) | 0.003   |
| <b>In-hospital death (score = 10)</b>                                                                                    |                          |               |                                           |              |         |
| Removing hospital discharge as censoring criteria                                                                        | 7.7% (466)               | 9.3% (1,078)  | 0.60                                      | (0.34, 1.06) | 0.078   |
| At most 90 days of follow-up period                                                                                      | 7.7% (466)               | 11.5% (1,078) | 0.59                                      | (0.36, 0.98) | 0.042   |

|                                                   |             |              |      |              |       |
|---------------------------------------------------|-------------|--------------|------|--------------|-------|
| Perform complete-case using the IPTW              | 7.7% (413)  | 11.8% (872)  | 0.66 | (0.45, 0.97) | 0.033 |
| <b>ARDS</b>                                       |             |              |      |              |       |
| Removing hospital discharge as censoring criteria | 10.7% (441) | 6.7% (1,040) | 1.04 | (0.60, 1.79) | 0.892 |
| At most 90 days of follow-up period               | 10.7% (441) | 8.2% (1,040) | 0.99 | (0.59, 1.66) | 0.965 |
| Perform complete-case using the IPTW              | 9.6% (397)  | 8.8% (841)   | 1.38 | (0.89, 2.13) | 0.153 |

---

Notes:

ARDS = acute respiratory distress syndrome; CI = confidence interval; Ct = cycle threshold; HR = hazard ratio; IgG = immunoglobulin G; IPTW = inverse probability of treatment weighting; PCR = polymerase chain reaction

† HR >1 (or <1) indicates remdesivir-dexamethasone was associated with better (worse) clinical improvement, early (late) hospital discharge or recovery; higher (lower) risk of in-hospital death, composite outcomes, or ARDS compared to the dexamethasone group

Supplementary Table 6. Subgroup analyses on the study outcomes

|                                                                              | Before weighting         |               | After weighting                           |              |         |
|------------------------------------------------------------------------------|--------------------------|---------------|-------------------------------------------|--------------|---------|
|                                                                              | Remdesivir-Dexamethasone | Dexamethasone | Remdesivir-Dexamethasone vs Dexamethasone |              |         |
|                                                                              | % (N)                    | % (N)         | HR†                                       | 95% CI       | P-value |
| <b>Clinical improvement on WHO clinical progression scale by ≥ 1 score</b>   |                          |               |                                           |              |         |
| Overall                                                                      | 92.1% (466)              | 88.1% (1,078) | 1.23                                      | (1.02, 1.49) | 0.032   |
| Age ≤ 65                                                                     | 97.3% (226)              | 97.4% (577)   | 1.20                                      | (0.95, 1.52) | 0.124   |
| Age > 65                                                                     | 87.1% (240)              | 77.4% (501)   | 1.35                                      | (1.00, 1.81) | 0.052   |
| Male                                                                         | 92.4% (264)              | 87.1% (628)   | 1.08                                      | (0.88, 1.32) | 0.445   |
| Female                                                                       | 91.6% (202)              | 89.6% (450)   | 1.36                                      | (1.01, 1.81) | 0.042   |
| Timing of dexamethasone initiation - within the first 3 days of admission    | 89.9% (227)              | 87.3% (490)   | 1.08                                      | (0.81, 1.44) | 0.580   |
| Timing of dexamethasone initiation - within the first 5 days of admission    | 91.6% (310)              | 88.7% (700)   | 1.22                                      | (0.95, 1.55) | 0.114   |
| Timing of dexamethasone initiation - within the first 7 days of admission    | 92.5% (387)              | 88.8% (875)   | 1.24                                      | (1.01, 1.53) | 0.038   |
| Excluding patients without use of remdesivir                                 | 92.1% (466)              | 82.6% (149)   | 1.76                                      | (1.38, 2.25) | <0.001  |
| Excluding patients initiating remdesivir later than dexamethasone initiation | 92.1% (466)              | 89.0% (929)   | 1.11                                      | (0.92, 1.35) | 0.257   |
| Without concomitant use of other systemic steroids                           | 92.1% (454)              | 89.3% (1,033) | 1.23                                      | (1.01, 1.49) | 0.035   |
| With concomitant use of other systemic steroids                              | 91.7% (12)               | 62.2% (45)    | 1.06                                      | (0.56, 2.02) | 0.856   |
| Administration route of dexamethasone - Oral                                 | 95.3% (64)               | 92.2% (283)   | 1.31                                      | (0.85, 2.03) | 0.217   |
| Administration route of dexamethasone - Intravenous injection                | 91.5% (402)              | 86.7% (795)   | 1.25                                      | (1.02, 1.53) | 0.028   |
| Dosage of dexamethasone - Up to 6mg daily                                    | 91.9% (185)              | 89.0% (518)   | 1.18                                      | (0.88, 1.57) | 0.267   |
| Dosage of dexamethasone - More than 6mg daily                                | 92.2% (281)              | 87.3% (560)   | 1.28                                      | (1.01, 1.61) | 0.042   |
| Drug initiation sequence - Remdesivir followed by dexamethasone              | 93.5% (93)               | 88.1% (1,078) | 1.64                                      | (1.19, 2.28) | 0.003   |
| Drug initiation sequence - Co-initiation of remdesivir and dexamethasone     | 91.7% (373)              | 88.1% (1,078) | 1.15                                      | (0.93, 1.43) | 0.189   |
| Without invasive mechanical ventilation or ECMO                              | 91.7% (448)              | 88.0% (1,056) | 1.23                                      | (1.01, 1.49) | 0.040   |
| With invasive mechanical ventilation or ECMO                                 | 100.0% (18)              | 95.5% (22)    | 0.84                                      | (0.40, 1.77) | 0.636   |
| Without ICU admission                                                        | 95.3% (338)              | 90.7% (842)   | 1.33                                      | (1.06, 1.66) | 0.014   |
| With ICU admission                                                           | 83.6% (128)              | 78.8% (236)   | 1.20                                      | (0.88, 1.62) | 0.246   |
| <b>Hospital discharge (score ≤ 3)</b>                                        |                          |               |                                           |              |         |
| Overall                                                                      | 90.6% (466)              | 87.1% (1,078) | 1.18                                      | (0.97, 1.43) | 0.090   |
| Age ≤ 65                                                                     | 96.9% (226)              | 97.2% (577)   | 1.10                                      | (0.86, 1.40) | 0.438   |
| Age > 65                                                                     | 84.6% (240)              | 75.4% (501)   | 1.34                                      | (0.99, 1.83) | 0.061   |
| Male                                                                         | 90.5% (264)              | 86.0% (628)   | 1.04                                      | (0.84, 1.27) | 0.737   |
| Female                                                                       | 90.6% (202)              | 88.7% (450)   | 1.30                                      | (0.97, 1.76) | 0.083   |
| Timing of dexamethasone initiation - within the first 3 days of admission    | 87.2% (227)              | 85.7% (490)   | 0.97                                      | (0.72, 1.31) | 0.860   |
| Timing of dexamethasone initiation - within the first 5 days of admission    | 89.4% (310)              | 87.4% (700)   | 1.13                                      | (0.88, 1.45) | 0.343   |
| Timing of dexamethasone initiation - within the first 7 days of admission    | 90.7% (387)              | 87.8% (875)   | 1.17                                      | (0.95, 1.44) | 0.147   |
| Excluding patients without use of remdesivir                                 | 90.6% (466)              | 80.5% (149)   | 1.73                                      | (1.36, 2.20) | <0.001  |
| Excluding patients initiating remdesivir later than dexamethasone initiation | 90.6% (466)              | 88.2% (929)   | 1.07                                      | (0.88, 1.29) | 0.514   |
| Without concomitant use of other systemic steroids                           | 90.7% (454)              | 88.3% (1,033) | 1.19                                      | (0.97, 1.44) | 0.089   |
| With concomitant use of other systemic steroids                              | 83.3% (12)               | 60.0% (45)    | 0.88                                      | (0.46, 1.68) | 0.698   |

|                                                                              |             |               |      |              |       |
|------------------------------------------------------------------------------|-------------|---------------|------|--------------|-------|
| Administration route of dexamethasone - Oral                                 | 95.3% (64)  | 91.9% (283)   | 1.34 | (0.86, 2.07) | 0.190 |
| Administration route of dexamethasone - Intravenous injection                | 89.8% (402) | 85.4% (795)   | 1.20 | (0.98, 1.47) | 0.085 |
| Dosage of dexamethasone - Up to 6mg daily                                    | 91.9% (185) | 87.8% (518)   | 1.22 | (0.91, 1.64) | 0.176 |
| Dosage of dexamethasone - More than 6mg daily                                | 89.7% (281) | 86.4% (560)   | 1.15 | (0.91, 1.47) | 0.247 |
| Drug initiation sequence - Remdesivir followed by dexamethasone              | 93.5% (93)  | 87.1% (1,078) | 1.74 | (1.25, 2.44) | 0.001 |
| Drug initiation sequence - Co-initiation of remdesivir and dexamethasone     | 89.8% (373) | 87.1% (1,078) | 1.09 | (0.87, 1.35) | 0.457 |
| Without invasive mechanical ventilation or ECMO                              | 91.3% (448) | 87.5% (1,056) | 1.24 | (1.02, 1.51) | 0.031 |
| With invasive mechanical ventilation or ECMO                                 | 72.2% (18)  | 68.2% (22)    | 0.67 | (0.29, 1.57) | 0.350 |
| Without ICU admission                                                        | 95.3% (338) | 90.1% (842)   | 1.37 | (1.09, 1.72) | 0.007 |
| With ICU admission                                                           | 78.1% (128) | 76.3% (236)   | 1.02 | (0.75, 1.39) | 0.882 |
| <b>Recovery (score ≤ 4)</b>                                                  |             |               |      |              |       |
| Overall                                                                      | 79.2% (154) | 74.5% (341)   | 0.94 | (0.72, 1.23) | 0.663 |
| Age ≤ 65                                                                     | 91.4% (58)  | 91.4% (140)   | 0.77 | (0.51, 1.16) | 0.212 |
| Age > 65                                                                     | 71.9% (96)  | 62.7% (201)   | 1.13 | (0.79, 1.61) | 0.499 |
| Male                                                                         | 80.0% (95)  | 72.2% (230)   | 1.05 | (0.75, 1.45) | 0.786 |
| Female                                                                       | 78.0% (59)  | 79.3% (111)   | 0.74 | (0.48, 1.12) | 0.152 |
| Timing of dexamethasone initiation - within the first 3 days of admission    | 80.2% (96)  | 74.4% (207)   | 0.85 | (0.61, 1.19) | 0.337 |
| Timing of dexamethasone initiation - within the first 5 days of admission    | 79.8% (114) | 75.6% (258)   | 0.88 | (0.65, 1.18) | 0.384 |
| Timing of dexamethasone initiation - within the first 7 days of admission    | 80.7% (135) | 75.8% (297)   | 0.92 | (0.70, 1.22) | 0.564 |
| Excluding patients without use of remdesivir                                 | 79.2% (154) | 71.9% (89)    | 1.11 | (0.74, 1.66) | 0.624 |
| Excluding patients initiating remdesivir later than dexamethasone initiation | 79.2% (154) | 75.4% (252)   | 0.86 | (0.65, 1.14) | 0.295 |
| Without concomitant use of other systemic steroids                           | 78.5% (144) | 77.0% (317)   | 0.91 | (0.69, 1.21) | 0.518 |
| With concomitant use of other systemic steroids                              | 90.0% (10)  | 41.7% (24)    | 1.66 | (0.62, 4.46) | 0.304 |
| Administration route of dexamethasone - Oral                                 | 94.1% (17)  | 81.8% (66)    | 0.89 | (0.51, 1.57) | 0.693 |
| Administration route of dexamethasone - Intravenous injection                | 77.4% (137) | 72.7% (275)   | 0.98 | (0.73, 1.31) | 0.889 |
| Dosage of dexamethasone - Up to 6mg daily                                    | 83.3% (42)  | 78.3% (152)   | 1.00 | (0.64, 1.58) | 0.989 |
| Dosage of dexamethasone - More than 6mg daily                                | 77.7% (112) | 71.4% (189)   | 0.92 | (0.65, 1.31) | 0.647 |
| Drug initiation sequence - Remdesivir followed by dexamethasone              | 78.3% (23)  | 74.5% (341)   | 1.74 | (1.12, 2.70) | 0.014 |
| Drug initiation sequence - Co-initiation of remdesivir and dexamethasone     | 79.4% (131) | 74.5% (341)   | 0.86 | (0.65, 1.13) | 0.272 |
| Without invasive mechanical ventilation or ECMO                              | 80.1% (136) | 75.0% (320)   | 1.00 | (0.76, 1.33) | 0.989 |
| With invasive mechanical ventilation or ECMO                                 | 72.2% (18)  | 66.7% (21)    | 0.70 | (0.30, 1.63) | 0.394 |
| Without ICU admission                                                        | 81.5% (27)  | 69.4% (108)   | 1.17 | (0.69, 1.96) | 0.560 |
| With ICU admission                                                           | 78.7% (127) | 76.8% (233)   | 1.05 | (0.77, 1.43) | 0.759 |
| <b>Viral clearance (first negative PCR result)</b>                           |             |               |      |              |       |
| Overall                                                                      | 32.7% (456) | 31.6% (1,043) | 1.29 | (0.93, 1.79) | 0.126 |
| Age ≤ 65                                                                     | 32.4% (222) | 31.8% (560)   | 1.20 | (0.79, 1.81) | 0.396 |
| Age > 65                                                                     | 32.9% (234) | 31.5% (483)   | 1.42 | (0.88, 2.31) | 0.153 |
| Male                                                                         | 33.7% (258) | 32.1% (610)   | 1.15 | (0.81, 1.64) | 0.423 |
| Female                                                                       | 31.3% (198) | 30.9% (433)   | 1.39 | (0.83, 2.32) | 0.211 |
| Timing of dexamethasone initiation - within the first 3 days of admission    | 39.0% (223) | 35.1% (485)   | 1.11 | (0.75, 1.63) | 0.610 |
| Timing of dexamethasone initiation - within the first 5 days of admission    | 35.9% (306) | 34.7% (686)   | 1.35 | (0.88, 2.06) | 0.169 |

|                                                                              |             |               |      |              |       |
|------------------------------------------------------------------------------|-------------|---------------|------|--------------|-------|
| Timing of dexamethasone initiation - within the first 7 days of admission    | 34.7% (383) | 33.5% (857)   | 1.38 | (0.96, 1.96) | 0.078 |
| Excluding patients without use of remdesivir                                 | 32.7% (456) | 40.5% (148)   | 1.27 | (0.84, 1.91) | 0.255 |
| Excluding patients initiating remdesivir later than dexamethasone initiation | 32.7% (456) | 30.2% (895)   | 1.30 | (0.93, 1.81) | 0.120 |
| Without concomitant use of other systemic steroids                           | 33.1% (444) | 31.7% (1,000) | 1.33 | (0.96, 1.85) | 0.086 |
| With concomitant use of other systemic steroids                              | 16.7% (12)  | 30.2% (43)    | 0.25 | (0.06, 1.06) | 0.060 |
| Administration route of dexamethasone - Oral                                 | 28.1% (64)  | 30.1% (279)   | 0.91 | (0.38, 2.19) | 0.838 |
| Administration route of dexamethasone - Intravenous injection                | 33.4% (392) | 32.2% (764)   | 1.40 | (0.99, 1.97) | 0.058 |
| Dosage of dexamethasone - Up to 6mg daily                                    | 33.9% (180) | 29.6% (503)   | 1.47 | (0.86, 2.50) | 0.159 |
| Dosage of dexamethasone - More than 6mg daily                                | 31.9% (276) | 33.5% (540)   | 1.14 | (0.80, 1.63) | 0.462 |
| Drug initiation sequence - Remdesivir followed by dexamethasone              | 23.6% (89)  | 31.6% (1,043) | 1.03 | (0.51, 2.06) | 0.943 |
| Drug initiation sequence - Co-initiation of remdesivir and dexamethasone     | 34.9% (367) | 31.6% (1,043) | 1.35 | (0.95, 1.93) | 0.097 |
| Without invasive mechanical ventilation or ECMO                              | 31.7% (439) | 31.0% (1,021) | 1.32 | (0.94, 1.85) | 0.112 |
| With invasive mechanical ventilation or ECMO                                 | 58.8% (17)  | 59.1% (22)    | 0.69 | (0.25, 1.91) | 0.464 |
| Without ICU admission                                                        | 27.7% (329) | 26.3% (813)   | 1.65 | (1.09, 2.49) | 0.018 |
| With ICU admission                                                           | 45.7% (127) | 50.4% (230)   | 0.77 | (0.48, 1.22) | 0.261 |
| <b>Low viral load (Ct value <math>\geq</math> 35)</b>                        |             |               |      |              |       |
| Overall                                                                      | 31.3% (457) | 31.2% (1,033) | 1.25 | (0.91, 1.72) | 0.177 |
| Age $\leq$ 65                                                                | 29.9% (221) | 31.2% (552)   | 1.18 | (0.72, 1.92) | 0.510 |
| Age > 65                                                                     | 32.6% (236) | 31.2% (481)   | 1.35 | (0.91, 2.02) | 0.140 |
| Male                                                                         | 33.6% (262) | 32.1% (605)   | 1.24 | (0.88, 1.75) | 0.216 |
| Female                                                                       | 28.2% (195) | 29.9% (428)   | 1.25 | (0.72, 2.16) | 0.422 |
| Timing of dexamethasone initiation - within the first 3 days of admission    | 40.3% (226) | 35.2% (480)   | 1.39 | (0.89, 2.17) | 0.151 |
| Timing of dexamethasone initiation - within the first 5 days of admission    | 35.2% (307) | 34.8% (683)   | 1.25 | (0.84, 1.85) | 0.275 |
| Timing of dexamethasone initiation - within the first 7 days of admission    | 34.3% (382) | 33.7% (846)   | 1.32 | (0.94, 1.86) | 0.103 |
| Excluding patients without use of remdesivir                                 | 31.3% (457) | 39.5% (147)   | 1.17 | (0.79, 1.73) | 0.435 |
| Excluding patients initiating remdesivir later than dexamethasone initiation | 31.3% (457) | 29.8% (886)   | 1.28 | (0.92, 1.77) | 0.140 |
| Without concomitant use of other systemic steroids                           | 31.5% (445) | 31.1% (990)   | 1.27 | (0.92, 1.76) | 0.146 |
| With concomitant use of other systemic steroids                              | 25.0% (12)  | 32.6% (43)    | 0.55 | (0.15, 2.00) | 0.353 |
| Administration route of dexamethasone - Oral                                 | 27.0% (63)  | 28.4% (268)   | 0.94 | (0.41, 2.15) | 0.886 |
| Administration route of dexamethasone - Intravenous injection                | 32.0% (394) | 32.2% (765)   | 1.28 | (0.91, 1.81) | 0.152 |
| Dosage of dexamethasone - Up to 6mg daily                                    | 30.9% (181) | 30.8% (493)   | 1.25 | (0.72, 2.19) | 0.425 |
| Dosage of dexamethasone - More than 6mg daily                                | 31.5% (276) | 31.5% (540)   | 1.23 | (0.87, 1.74) | 0.242 |
| Drug initiation sequence - Remdesivir followed by dexamethasone              | 32.2% (90)  | 31.2% (1,033) | 2.00 | (0.94, 4.28) | 0.073 |
| Drug initiation sequence - Co-initiation of remdesivir and dexamethasone     | 31.1% (367) | 31.2% (1,033) | 1.09 | (0.80, 1.48) | 0.587 |
| Without invasive mechanical ventilation or ECMO                              | 30.1% (439) | 30.9% (1,012) | 1.21 | (0.86, 1.70) | 0.281 |
| With invasive mechanical ventilation or ECMO                                 | 61.1% (18)  | 42.9% (21)    | 1.40 | (0.59, 3.35) | 0.433 |
| Without ICU admission                                                        | 23.7% (329) | 27.7% (802)   | 1.21 | (0.77, 1.91) | 0.398 |
| With ICU admission                                                           | 50.8% (128) | 43.3% (231)   | 1.18 | (0.78, 1.78) | 0.443 |
| <b>IgG antibody</b>                                                          |             |               |      |              |       |
| Overall                                                                      | 97.1% (339) | 91.7% (806)   | 1.22 | (1.02, 1.46) | 0.029 |
| Age $\leq$ 65                                                                | 98.7% (149) | 96.2% (418)   | 1.11 | (0.83, 1.49) | 0.492 |

|                                                                              |             |             |      |              |        |
|------------------------------------------------------------------------------|-------------|-------------|------|--------------|--------|
| Age > 65                                                                     | 95.8% (190) | 86.9% (388) | 1.34 | (1.07, 1.67) | 0.012  |
| Male                                                                         | 97.9% (193) | 93.1% (466) | 1.02 | (0.83, 1.25) | 0.859  |
| Female                                                                       | 95.9% (146) | 89.7% (340) | 1.47 | (1.14, 1.91) | 0.003  |
| Timing of dexamethasone initiation - within the first 3 days of admission    | 95.7% (188) | 90.5% (431) | 1.20 | (0.91, 1.59) | 0.187  |
| Timing of dexamethasone initiation - within the first 5 days of admission    | 96.5% (254) | 91.5% (588) | 1.23 | (0.98, 1.54) | 0.071  |
| Timing of dexamethasone initiation - within the first 7 days of admission    | 97.0% (299) | 91.5% (707) | 1.25 | (1.02, 1.52) | 0.032  |
| Excluding patients without use of remdesivir                                 | 97.1% (339) | 96.0% (125) | 1.60 | (1.26, 2.03) | <0.001 |
| Excluding patients initiating remdesivir later than dexamethasone initiation | 97.1% (339) | 90.9% (681) | 1.13 | (0.94, 1.35) | 0.206  |
| Without concomitant use of other systemic steroids                           | 97.0% (329) | 92.1% (769) | 1.23 | (1.02, 1.48) | 0.029  |
| With concomitant use of other systemic steroids                              | 100.0% (10) | 83.8% (37)  | 0.91 | (0.44, 1.91) | 0.806  |
| Administration route of dexamethasone - Oral                                 | 100.0% (58) | 91.5% (212) | 1.13 | (0.80, 1.60) | 0.483  |
| Administration route of dexamethasone - Intravenous injection                | 96.4% (281) | 91.8% (594) | 1.25 | (1.01, 1.55) | 0.039  |
| Dosage of dexamethasone - Up to 6mg daily                                    | 97.9% (143) | 92.0% (386) | 1.49 | (1.14, 1.96) | 0.004  |
| Dosage of dexamethasone - More than 6mg daily                                | 96.4% (196) | 91.4% (420) | 1.05 | (0.84, 1.32) | 0.658  |
| Drug initiation sequence - Remdesivir followed by dexamethasone              | 98.3% (58)  | 91.7% (806) | 1.32 | (0.79, 2.21) | 0.288  |
| Drug initiation sequence - Co-initiation of remdesivir and dexamethasone     | 96.8% (281) | 91.7% (806) | 1.20 | (1.01, 1.44) | 0.042  |
| Without invasive mechanical ventilation or ECMO                              | 97.2% (325) | 92.1% (789) | 1.23 | (1.02, 1.48) | 0.026  |
| With invasive mechanical ventilation or ECMO                                 | 92.9% (14)  | 70.6% (17)  | 2.06 | (0.69, 6.15) | 0.188  |
| Without ICU admission                                                        | 97.4% (228) | 91.6% (608) | 1.30 | (1.03, 1.63) | 0.027  |
| With ICU admission                                                           | 96.4% (111) | 91.9% (198) | 1.20 | (0.92, 1.57) | 0.182  |

#### **In-hospital death or invasive mechanical ventilation (score ≥ 7)**

|                                                                              |             |               |      |              |        |
|------------------------------------------------------------------------------|-------------|---------------|------|--------------|--------|
| Overall                                                                      | 14.5% (448) | 18.8% (1,059) | 0.67 | (0.46, 0.96) | 0.031  |
| Age ≤ 65                                                                     | 7.3% (220)  | 7.2% (570)    | 0.86 | (0.42, 1.75) | 0.669  |
| Age > 65                                                                     | 21.5% (228) | 32.3% (489)   | 0.59 | (0.39, 0.90) | 0.014  |
| Male                                                                         | 15.1% (252) | 20.9% (616)   | 0.70 | (0.42, 1.15) | 0.154  |
| Female                                                                       | 13.8% (196) | 15.8% (443)   | 0.65 | (0.39, 1.10) | 0.108  |
| Timing of dexamethasone initiation - within the first 3 days of admission    | 22.1% (213) | 23.6% (479)   | 0.78 | (0.51, 1.19) | 0.249  |
| Timing of dexamethasone initiation - within the first 5 days of admission    | 17.6% (295) | 21.2% (685)   | 0.71 | (0.48, 1.04) | 0.080  |
| Timing of dexamethasone initiation - within the first 7 days of admission    | 15.4% (370) | 19.7% (859)   | 0.69 | (0.48, 1.00) | 0.050  |
| Excluding patients without use of remdesivir                                 | 14.5% (448) | 34.2% (146)   | 0.40 | (0.24, 0.65) | <0.001 |
| Excluding patients initiating remdesivir later than dexamethasone initiation | 14.5% (448) | 16.3% (913)   | 0.79 | (0.54, 1.15) | 0.219  |
| Without concomitant use of other systemic steroids                           | 14.2% (438) | 17.7% (1,016) | 0.71 | (0.49, 1.04) | 0.076  |
| With concomitant use of other systemic steroids                              | 30.0% (10)  | 44.2% (43)    | 0.14 | (0.03, 0.74) | 0.021  |
| Administration route of dexamethasone - Oral                                 | 10.9% (64)  | 11.7% (282)   | 1.10 | (0.39, 3.05) | 0.860  |
| Administration route of dexamethasone - Intravenous injection                | 15.1% (384) | 21.4% (777)   | 0.59 | (0.40, 0.86) | 0.006  |
| Dosage of dexamethasone - Up to 6mg daily                                    | 12.0% (183) | 17.9% (503)   | 0.56 | (0.33, 0.93) | 0.025  |
| Dosage of dexamethasone - More than 6mg daily                                | 16.2% (265) | 19.6% (556)   | 0.76 | (0.46, 1.24) | 0.268  |
| Drug initiation sequence - Remdesivir followed by dexamethasone              | 7.7% (91)   | 18.8% (1,059) | 0.43 | (0.15, 1.23) | 0.115  |
| Drug initiation sequence - Co-initiation of remdesivir and dexamethasone     | 16.2% (357) | 18.8% (1,059) | 0.72 | (0.49, 1.06) | 0.095  |
| Without invasive mechanical ventilation or ECMO                              | 14.5% (448) | 18.8% (1,056) | 0.67 | (0.46, 0.97) | 0.032  |
| With invasive mechanical ventilation or ECMO                                 | NA (0)      | 33.3% (3)     | NA   | NA           | NA     |

|                                                                                                          |             |               |      |              |        |
|----------------------------------------------------------------------------------------------------------|-------------|---------------|------|--------------|--------|
| Without ICU admission                                                                                    | 4.1% (338)  | 10.2% (842)   | 0.37 | (0.18, 0.74) | 0.005  |
| With ICU admission                                                                                       | 46.4% (110) | 52.1% (217)   | 0.80 | (0.51, 1.26) | 0.338  |
| <b>In-hospital death or invasive mechanical ventilation (score ≥ 7) or intensive care unit admission</b> |             |               |      |              |        |
| Overall                                                                                                  | 11.3% (417) | 17.4% (1,016) | 0.64 | (0.43, 0.97) | 0.034  |
| Age ≤ 65                                                                                                 | 5.7% (209)  | 5.9% (546)    | 0.98 | (0.45, 2.14) | 0.956  |
| Age > 65                                                                                                 | 16.8% (208) | 30.9% (470)   | 0.54 | (0.33, 0.87) | 0.011  |
| Male                                                                                                     | 10.8% (232) | 19.6% (588)   | 0.63 | (0.35, 1.13) | 0.125  |
| Female                                                                                                   | 11.9% (185) | 14.5% (428)   | 0.69 | (0.39, 1.19) | 0.180  |
| Timing of dexamethasone initiation - within the first 3 days of admission                                | 15.1% (185) | 20.5% (438)   | 0.74 | (0.46, 1.22) | 0.237  |
| Timing of dexamethasone initiation - within the first 5 days of admission                                | 12.5% (265) | 19.0% (642)   | 0.66 | (0.42, 1.03) | 0.064  |
| Timing of dexamethasone initiation - within the first 7 days of admission                                | 11.2% (339) | 17.9% (816)   | 0.65 | (0.43, 0.99) | 0.043  |
| Excluding patients without use of remdesivir                                                             | 11.3% (417) | 36.3% (124)   | 0.35 | (0.20, 0.61) | <0.001 |
| Excluding patients initiating remdesivir later than dexamethasone initiation                             | 11.3% (417) | 14.8% (892)   | 0.76 | (0.50, 1.16) | 0.205  |
| Without concomitant use of other systemic steroids                                                       | 11.2% (409) | 16.3% (974)   | 0.70 | (0.46, 1.06) | 0.091  |
| With concomitant use of other systemic steroids                                                          | 12.5% (8)   | 42.9% (42)    | 0.09 | (0.01, 0.85) | 0.036  |
| Administration route of dexamethasone - Oral                                                             | 10.0% (60)  | 11.3% (275)   | 1.09 | (0.38, 3.15) | 0.876  |
| Administration route of dexamethasone - Intravenous injection                                            | 11.5% (357) | 19.7% (741)   | 0.56 | (0.36, 0.85) | 0.007  |
| Dosage of dexamethasone - Up to 6mg daily                                                                | 9.7% (176)  | 16.3% (484)   | 0.53 | (0.30, 0.94) | 0.029  |
| Dosage of dexamethasone - More than 6mg daily                                                            | 12.4% (241) | 18.4% (532)   | 0.73 | (0.42, 1.27) | 0.262  |
| Drug initiation sequence - Remdesivir followed by dexamethasone                                          | 7.8% (90)   | 17.4% (1,016) | 0.47 | (0.16, 1.35) | 0.159  |
| Drug initiation sequence - Co-initiation of remdesivir and dexamethasone                                 | 12.2% (327) | 17.4% (1,016) | 0.68 | (0.44, 1.05) | 0.082  |
| Without invasive mechanical ventilation or ECMO                                                          | 11.3% (417) | 17.4% (1,013) | 0.64 | (0.43, 0.97) | 0.035  |
| With invasive mechanical ventilation or ECMO                                                             | NA (0)      | 33.3% (3)     | NA   | NA           | NA     |
| Without ICU admission                                                                                    | 4.4% (338)  | 10.8% (842)   | 0.35 | (0.18, 0.69) | 0.003  |
| With ICU admission                                                                                       | 40.5% (79)  | 49.4% (174)   | 0.88 | (0.51, 1.53) | 0.658  |
| <b>In-hospital death (score = 10)</b>                                                                    |             |               |      |              |        |
| Overall                                                                                                  | 7.7% (466)  | 11.6% (1,078) | 0.59 | (0.36, 0.98) | 0.042  |
| Age ≤ 65                                                                                                 | 1.8% (226)  | 2.1% (577)    | 0.82 | (0.17, 4.02) | 0.807  |
| Age > 65                                                                                                 | 13.3% (240) | 22.6% (501)   | 0.56 | (0.33, 0.94) | 0.029  |
| Male                                                                                                     | 7.6% (264)  | 12.3% (628)   | 0.55 | (0.28, 1.07) | 0.079  |
| Female                                                                                                   | 7.9% (202)  | 10.7% (450)   | 0.63 | (0.30, 1.29) | 0.204  |
| Timing of dexamethasone initiation - within the first 3 days of admission                                | 10.1% (227) | 13.1% (490)   | 0.53 | (0.29, 0.95) | 0.033  |
| Timing of dexamethasone initiation - within the first 5 days of admission                                | 8.4% (310)  | 11.1% (700)   | 0.56 | (0.32, 0.98) | 0.042  |
| Timing of dexamethasone initiation - within the first 7 days of admission                                | 7.5% (387)  | 10.9% (875)   | 0.56 | (0.33, 0.95) | 0.033  |
| Excluding patients without use of remdesivir                                                             | 7.7% (466)  | 16.8% (149)   | 0.59 | (0.30, 1.19) | 0.143  |
| Excluding patients initiating remdesivir later than dexamethasone initiation                             | 7.7% (466)  | 10.8% (929)   | 0.60 | (0.36, 1.00) | 0.050  |
| Without concomitant use of other systemic steroids                                                       | 7.5% (454)  | 10.6% (1,033) | 0.63 | (0.37, 1.07) | 0.087  |
| With concomitant use of other systemic steroids                                                          | 16.7% (12)  | 35.6% (45)    | 0.28 | (0.06, 1.43) | 0.124  |
| Administration route of dexamethasone - Oral                                                             | 4.7% (64)   | 7.4% (283)    | 1.15 | (0.33, 3.99) | 0.830  |
| Administration route of dexamethasone - Intravenous injection                                            | 8.2% (402)  | 13.1% (795)   | 0.51 | (0.30, 0.86) | 0.011  |
| Dosage of dexamethasone - Up to 6mg daily                                                                | 5.9% (185)  | 11.4% (518)   | 0.52 | (0.26, 1.06) | 0.072  |

|                                                                          |             |               |      |              |       |
|--------------------------------------------------------------------------|-------------|---------------|------|--------------|-------|
| Dosage of dexamethasone - More than 6mg daily                            | 8.9% (281)  | 11.8% (560)   | 0.64 | (0.33, 1.25) | 0.189 |
| Drug initiation sequence - Remdesivir followed by dexamethasone          | 6.5% (93)   | 11.6% (1,078) | 0.83 | (0.27, 2.51) | 0.740 |
| Drug initiation sequence - Co-initiation of remdesivir and dexamethasone | 8.0% (373)  | 11.6% (1,078) | 0.54 | (0.31, 0.93) | 0.026 |
| Without invasive mechanical ventilation or ECMO                          | 7.1% (448)  | 11.2% (1,056) | 0.61 | (0.36, 1.05) | 0.074 |
| With invasive mechanical ventilation or ECMO                             | 22.2% (18)  | 31.8% (22)    | 0.35 | (0.08, 1.52) | 0.155 |
| Without ICU admission                                                    | 3.8% (338)  | 9.1% (842)    | 0.41 | (0.20, 0.85) | 0.017 |
| With ICU admission                                                       | 18.0% (128) | 20.3% (236)   | 0.76 | (0.38, 1.51) | 0.430 |

#### ARDS

|                                                                              |             |              |       |                |       |
|------------------------------------------------------------------------------|-------------|--------------|-------|----------------|-------|
| Overall                                                                      | 10.7% (441) | 8.2% (1,040) | 0.99  | (0.59, 1.66)   | 0.965 |
| Age ≤ 65                                                                     | 9.1% (219)  | 7.5% (561)   | 0.92  | (0.44, 1.92)   | 0.823 |
| Age > 65                                                                     | 12.2% (222) | 9.0% (479)   | 1.04  | (0.51, 2.14)   | 0.910 |
| Male                                                                         | 10.5% (247) | 8.7% (598)   | 1.00  | (0.49, 2.04)   | 0.999 |
| Female                                                                       | 10.8% (194) | 7.5% (442)   | 0.98  | (0.47, 2.05)   | 0.949 |
| Timing of dexamethasone initiation - within the first 3 days of admission    | 14.9% (208) | 12.3% (471)  | 0.98  | (0.54, 1.80)   | 0.953 |
| Timing of dexamethasone initiation - within the first 5 days of admission    | 12.8% (289) | 11.3% (675)  | 0.88  | (0.51, 1.51)   | 0.637 |
| Timing of dexamethasone initiation - within the first 7 days of admission    | 12.1% (364) | 9.3% (839)   | 0.93  | (0.56, 1.54)   | 0.783 |
| Excluding patients without use of remdesivir                                 | 10.7% (441) | 22.1% (140)  | 0.43  | (0.23, 0.80)   | 0.008 |
| Excluding patients initiating remdesivir later than dexamethasone initiation | 10.7% (441) | 6.0% (900)   | 1.40  | (0.81, 2.42)   | 0.223 |
| Without concomitant use of other systemic steroids                           | 10.4% (432) | 8.1% (997)   | 0.95  | (0.56, 1.62)   | 0.857 |
| With concomitant use of other systemic steroids                              | 22.2% (9)   | 9.3% (43)    | 1.73  | (0.38, 7.83)   | 0.466 |
| Administration route of dexamethasone - Oral                                 | 16.9% (59)  | 9.7% (267)   | 1.35  | (0.42, 4.39)   | 0.614 |
| Administration route of dexamethasone - Intravenous injection                | 9.7% (382)  | 7.6% (773)   | 0.92  | (0.53, 1.60)   | 0.775 |
| Dosage of dexamethasone - Up to 6mg daily                                    | 10.9% (174) | 9.3% (496)   | 0.88  | (0.40, 1.95)   | 0.750 |
| Dosage of dexamethasone - More than 6mg daily                                | 10.5% (267) | 7.2% (544)   | 1.13  | (0.58, 2.19)   | 0.727 |
| Drug initiation sequence - Remdesivir followed by dexamethasone              | 7.5% (93)   | 8.2% (1,040) | 0.59  | (0.22, 1.57)   | 0.294 |
| Drug initiation sequence - Co-initiation of remdesivir and dexamethasone     | 11.5% (348) | 8.2% (1,040) | 1.10  | (0.63, 1.93)   | 0.737 |
| Without invasive mechanical ventilation or ECMO                              | 9.8% (427)  | 8.2% (1,023) | 0.82  | (0.47, 1.42)   | 0.472 |
| With invasive mechanical ventilation or ECMO                                 | 35.7% (14)  | 5.9% (17)    | 13.10 | (1.20, 142.71) | 0.036 |
| Without ICU admission                                                        | 4.5% (333)  | 2.5% (828)   | 1.63  | (0.63, 4.17)   | 0.310 |
| With ICU admission                                                           | 29.6% (108) | 30.2% (212)  | 0.72  | (0.40, 1.29)   | 0.267 |

#### Notes:

ARDS = acute respiratory distress syndrome; CI = confidence interval; Ct = cycle threshold; ECMO = extracorporeal membrane oxygenation; HR = hazard ratio; ICU = intensive care unit; IgG = immunoglobulin G; PCR = polymerase chain reaction

† HR >1 (or <1) indicates remdesivir-dexamethasone was associated with better (worse) clinical improvement, early (late) hospital discharge or recovery; higher (lower) risk of in-hospital death, composite outcomes, or ARDS compared to the dexamethasone group



Supplementary Table 7. Clinical status of patients as indicated by the WHO clinical progression scale score

| <b>Day from baseline</b>                | <b>0</b>                                |                            | <b>7</b>                                |                            | <b>15</b>                               |                            |
|-----------------------------------------|-----------------------------------------|----------------------------|-----------------------------------------|----------------------------|-----------------------------------------|----------------------------|
| Clinical status                         | Remdesivir-<br>Dexamethasone<br>(N=466) | Dexamethasone<br>(N=1,078) | Remdesivir-<br>Dexamethasone<br>(N=466) | Dexamethasone<br>(N=1,078) | Remdesivir-<br>Dexamethasone<br>(N=466) | Dexamethasone<br>(N=1,078) |
| Before weighting                        | N                                       | N                          | N                                       | N                          | N                                       | N                          |
| Discharge                               | 0                                       | 0                          | 96                                      | 157                        | 564                                     | 564                        |
| No oxygen therapy                       | 312                                     | 737                        | 178                                     | 452                        | 138                                     | 138                        |
| Supplemental oxygen without ventilation | 136                                     | 322                        | 159                                     | 385                        | 275                                     | 275                        |
| Mechanical ventilation                  | 18                                      | 19                         | 28                                      | 53                         | 25                                      | 25                         |
| In-hospital death                       | 0                                       | 0                          | 5                                       | 31                         | 76                                      | 76                         |
| After weighting                         | %                                       | %                          | %                                       | %                          | %                                       | %                          |
| Discharge                               | 0%                                      | 0%                         | 26%                                     | 15%                        | 59%                                     | 51%                        |
| No oxygen therapy                       | 72%                                     | 67%                        | 38%                                     | 41%                        | 11%                                     | 13%                        |
| Supplemental oxygen without ventilation | 23%                                     | 31%                        | 29%                                     | 37%                        | 25%                                     | 27%                        |
| Mechanical ventilation                  | 4%                                      | 2%                         | 6%                                      | 5%                         | 4%                                      | 3%                         |
| In-hospital death                       | 0%                                      | 0%                         | 1%                                      | 3%                         | 2%                                      | 7%                         |
| <b>Day from baseline</b>                | <b>30</b>                               |                            | <b>60</b>                               |                            | <b>90</b>                               |                            |
| Clinical status                         | Remdesivir-<br>Dexamethasone<br>(N=466) | Dexamethasone<br>(N=1,078) | Remdesivir-<br>Dexamethasone<br>(N=466) | Dexamethasone<br>(N=1,078) | Remdesivir-<br>Dexamethasone<br>(N=466) | Dexamethasone<br>(N=1,078) |
| Before weighting                        | N                                       | N                          | N                                       | N                          | N                                       | N                          |
| Discharge                               | 360                                     | 797                        | 403                                     | 889                        | 417                                     | 915                        |
| No oxygen therapy                       | 9                                       | 47                         | 3                                       | 13                         | 3                                       | 7                          |
| Supplemental oxygen without ventilation | 60                                      | 107                        | 24                                      | 42                         | 6                                       | 20                         |
| Mechanical ventilation                  | 17                                      | 27                         | 5                                       | 16                         | 4                                       | 12                         |
| In-hospital death                       | 20                                      | 100                        | 31                                      | 118                        | 36                                      | 124                        |
| After weighting                         | %                                       | %                          | %                                       | %                          | %                                       | %                          |
| Discharge                               | 81%                                     | 73%                        | 88%                                     | 82%                        | 91%                                     | 85%                        |
| No oxygen therapy                       | 2%                                      | 5%                         | 1%                                      | 1%                         | 1%                                      | 1%                         |
| Supplemental oxygen without ventilation | 10%                                     | 10%                        | 6%                                      | 4%                         | 1%                                      | 2%                         |
| Mechanical ventilation                  | 4%                                      | 3%                         | 1%                                      | 2%                         | 1%                                      | 1%                         |
| In-hospital death                       | 3%                                      | 10%                        | 5%                                      | 11%                        | 6%                                      | 11%                        |

Supplementary Table 8. Comparison of changes in laboratory parameters from baseline to the last measurement available during hospitalization

|                                                    |                          | Baseline      | Baseline (with last measurement) | Last measurement | Paired difference | P-value* for difference = 0 |
|----------------------------------------------------|--------------------------|---------------|----------------------------------|------------------|-------------------|-----------------------------|
| White blood cell, $\times 10^9/L$ (Mean $\pm$ SD)  | Remdesivir-Dexamethasone | 5.5 (2.2)     | 5.5 (2.2)                        | 8.7 (3.6)        | 3.2 (3.9)         | <0.001                      |
|                                                    | Dexamethasone            | 5.7 (2.5)     | 5.7 (2.5)                        | 8.8 (4.2)        | 3.1 (4.2)         | <0.001                      |
|                                                    | P-value $\dagger$        | 0.046         | 0.051                            | 0.373            | 0.707             |                             |
| Neutrophil, $\times 10^9/L$ (Mean $\pm$ SD)        | Remdesivir-Dexamethasone | 3.9 (2.1)     | 3.9 (2.1)                        | 6.4 (3.3)        | 2.5 (3.7)         | <0.001                      |
|                                                    | Dexamethasone            | 4.2 (2.4)     | 4.2 (2.4)                        | 6.6 (4.0)        | 2.4 (4.1)         | <0.001                      |
|                                                    | P-value $\dagger$        | 0.026         | 0.029                            | 0.252            | 0.721             |                             |
| Lymphocyte, $\times 10^9/L$ (Mean $\pm$ SD)        | Remdesivir-Dexamethasone | 1.0 (0.5)     | 1.0 (0.5)                        | 1.4 (0.9)        | 0.4 (0.8)         | <0.001                      |
|                                                    | Dexamethasone            | 1.0 (0.4)     | 1.0 (0.4)                        | 1.4 (0.8)        | 0.4 (0.7)         | <0.001                      |
|                                                    | P-value $\dagger$        | 0.803         | 0.770                            | 0.121            | 0.061             |                             |
| Platelet, $\times 10^9/L$ (Mean $\pm$ SD)          | Remdesivir-Dexamethasone | 176.4 (63.3)  | 176.4 (63.3)                     | 311.7 (108.1)    | 135.3 (93.7)      | <0.001                      |
|                                                    | Dexamethasone            | 183.9 (72.3)  | 183.9 (72.3)                     | 304.3 (124.6)    | 120.4 (112.5)     | <0.001                      |
|                                                    | P-value $\dagger$        | 0.008         | 0.008                            | 0.117            | <0.001            |                             |
| Lactate dehydrogenase, U/L (Mean $\pm$ SD)         | Remdesivir-Dexamethasone | 320.6 (127.7) | 320.5 (127.6)                    | 272.3 (107.7)    | -48.1 (139.7)     | <0.001                      |
|                                                    | Dexamethasone            | 324.2 (145.7) | 323.8 (146.1)                    | 303.1 (688.9)    | -20.6 (693.1)     | 0.248                       |
|                                                    | P-value $\dagger$        | 0.564         | 0.604                            | 0.085            | 0.137             |                             |
| Creatine kinase, U/L (Mean $\pm$ SD)               | Remdesivir-Dexamethasone | 269.0 (481.5) | 260.7 (485.5)                    | 75.6 (91.7)      | -185.1 (469.2)    | <0.001                      |
|                                                    | Dexamethasone            | 258.8 (508.7) | 270.2 (523.7)                    | 226.4 (2,363.8)  | -43.8 (2,419.7)   | 0.535                       |
|                                                    | P-value $\dagger$        | 0.756         | 0.669                            | 0.030            | 0.054             |                             |
| Total bilirubin, $\mu\text{mol/L}$ (Mean $\pm$ SD) | Remdesivir-Dexamethasone | 9.3 (6.0)     | 9.3 (6.0)                        | 10.4 (8.6)       | 1.1 (8.1)         | <0.001                      |
|                                                    | Dexamethasone            | 9.9 (6.8)     | 9.9 (6.8)                        | 10.5 (18.2)      | 0.6 (17.7)        | 0.175                       |
|                                                    | P-value $\dagger$        | 0.072         | 0.068                            | 0.913            | 0.350             |                             |

|                                           |                          |              |              |               |              |        |
|-------------------------------------------|--------------------------|--------------|--------------|---------------|--------------|--------|
| C-reactive protein, mg/L (Mean±SD)        | Remdesivir-Dexamethasone | 56.8 (48.7)  | 56.6 (48.7)  | 17.1 (38.0)   | -39.5 (56.9) | <0.001 |
|                                           | Dexamethasone            | 60.1 (57.8)  | 59.5 (56.4)  | 19.7 (40.5)   | -39.7 (61.5) | <0.001 |
|                                           | P-value†                 | 0.161        | 0.230        | 0.095         | 0.934        |        |
| Cycle threshold value, cycle (Mean±SD)    | Remdesivir-Dexamethasone | 24.9 (6.0)   | 24.8 (6.0)   | 31.0 (7.4)    | 6.2 (8.7)    | <0.001 |
|                                           | Dexamethasone            | 24.1 (5.6)   | 24.0 (5.6)   | 30.8 (7.0)    | 6.8 (8.6)    | <0.001 |
|                                           | P-value†                 | 0.007        | 0.007        | 0.389         | 0.158        |        |
| eGFR, mL/min/1.73m <sup>2</sup> (Mean±SD) | Remdesivir-Dexamethasone | 104.9 (44.8) | 104.9 (44.8) | 117.8 (62.5)  | 12.9 (70.2)  | <0.001 |
|                                           | Dexamethasone            | 106.7 (80.3) | 106.7 (80.3) | 157.5 (837.7) | 50.7 (839.6) | 0.041  |
|                                           | P-value†                 | 0.588        | 0.582        | 0.110         | 0.129        |        |
| ALP, U/L (Mean±SD)                        | Remdesivir-Dexamethasone | 67.9 (33.8)  | 67.9 (33.4)  | 73.3 (27.7)   | 5.3 (28.5)   | <0.001 |
|                                           | Dexamethasone            | 72.3 (49.4)  | 72.2 (49.4)  | 81.0 (53.4)   | 8.8 (53.0)   | <0.001 |
|                                           | P-value†                 | 0.019        | 0.013        | <0.001        | 0.048        |        |
| ALT, U/L (Mean±SD)                        | Remdesivir-Dexamethasone | 36.0 (24.4)  | 36.0 (24.4)  | 48.5 (44.9)   | 12.5 (43.4)  | <0.001 |
|                                           | Dexamethasone            | 38.4 (39.2)  | 38.4 (39.2)  | 74.1 (268.2)  | 35.7 (267.9) | <0.001 |
|                                           | P-value†                 | 0.062        | 0.064        | <0.001        | 0.002        |        |
| Hemoglobin, g/dL (Mean±SD)                | Remdesivir-Dexamethasone | 13.3 (1.4)   | 13.3 (1.4)   | 12.7 (1.9)    | -0.6 (1.6)   | <0.001 |
|                                           | Dexamethasone            | 13.2 (1.8)   | 13.2 (1.8)   | 12.4 (2.0)    | -0.9 (1.7)   | <0.001 |
|                                           | P-value†                 | 0.462        | 0.462        | <0.001        | <0.001       |        |

Notes:

ALP = alkaline phosphatase; ALT = alanine transaminase; eGFR = estimated glomerular filtration rate; SD = standard deviation

† P-value is calculated by linear regression between remdesivir-dexamethasone and dexamethasone groups

\* P-value is calculated by paired t-test within remdesivir-dexamethasone and dexamethasone groups

Supplementary Figure 1. Distribution of timing of dexamethasone initiation by the two treatment groups

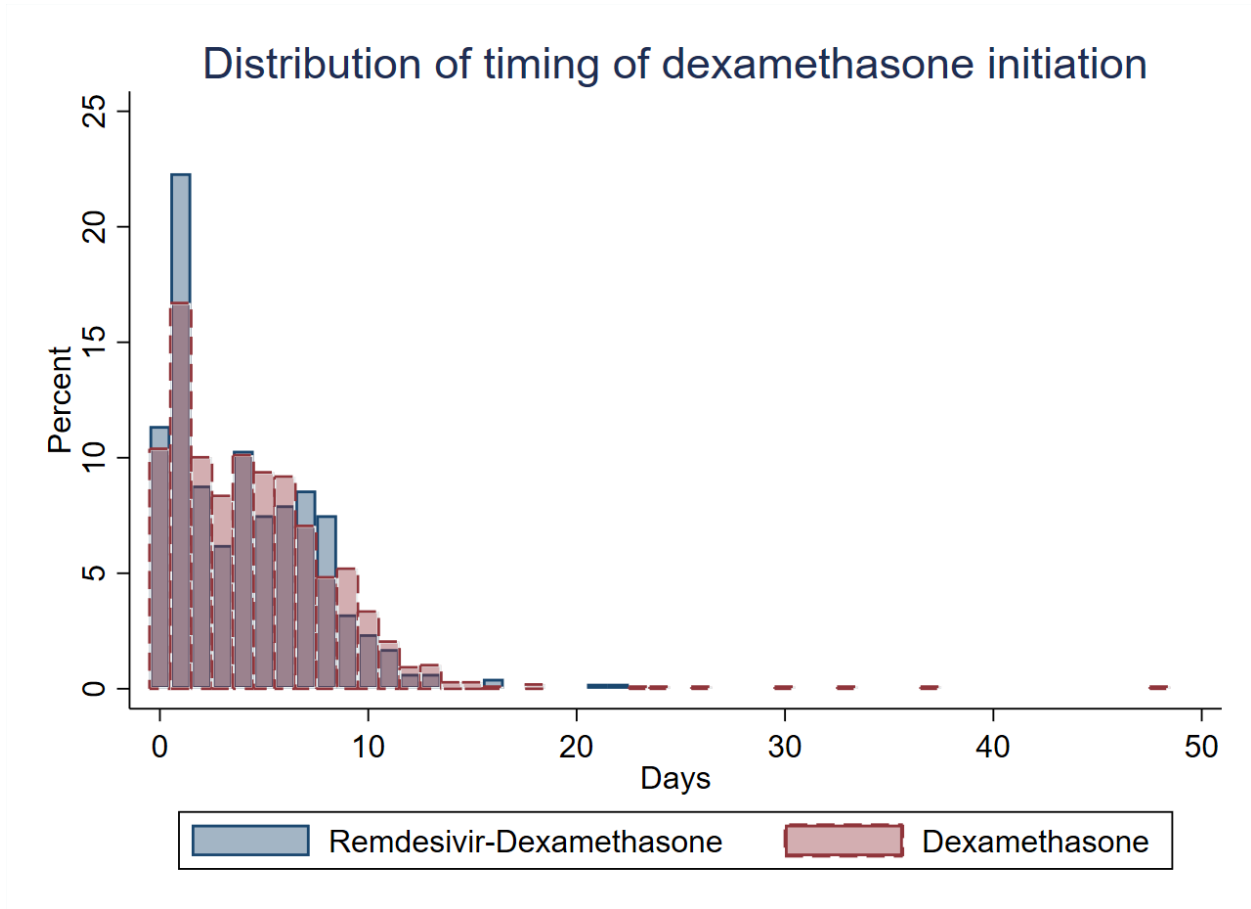

**Supplementary Figure 2. Flowchart of including eligible COVID-19 patients who were treated with dexamethasone during hospitalization**

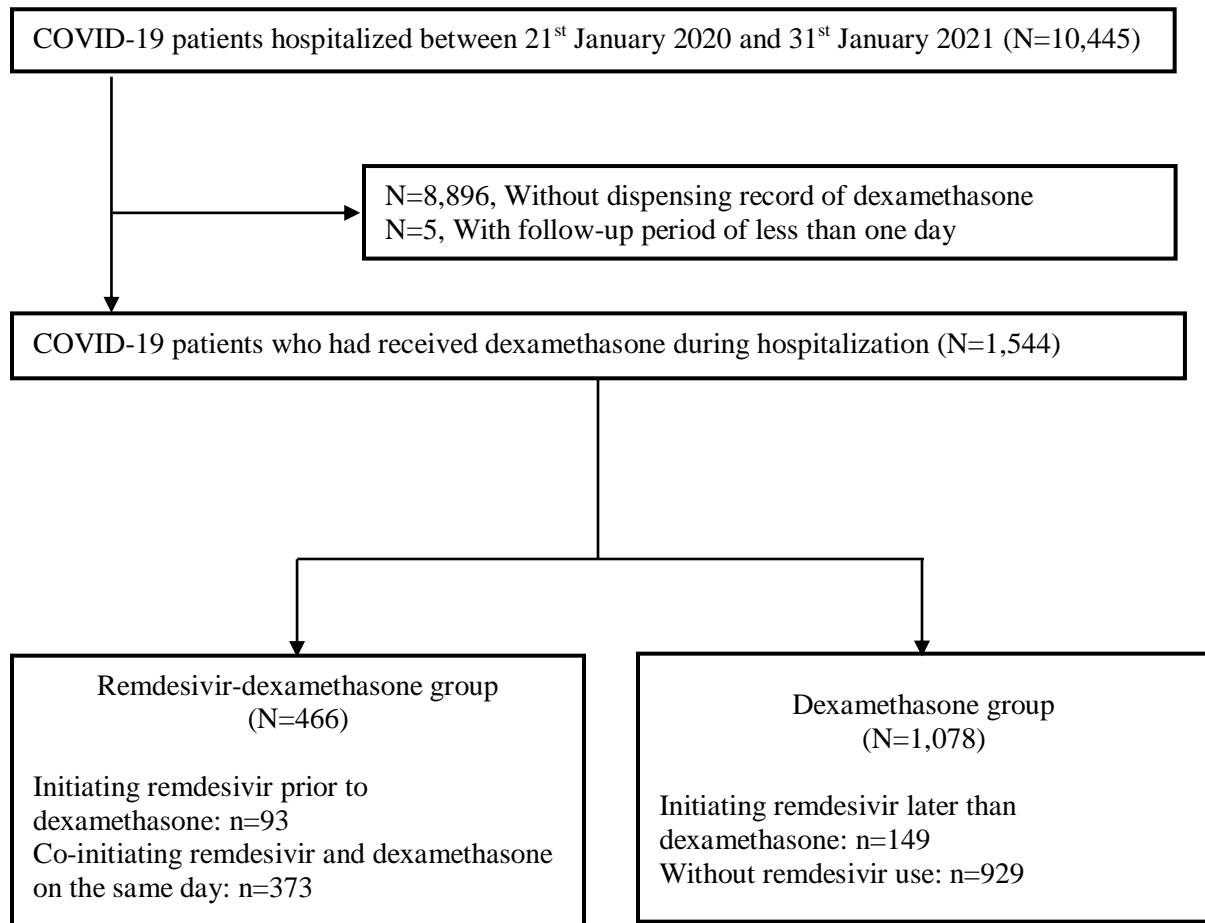

**Supplementary Figure 3. Distribution of propensity score density by the two treatment groups before and after weighting**

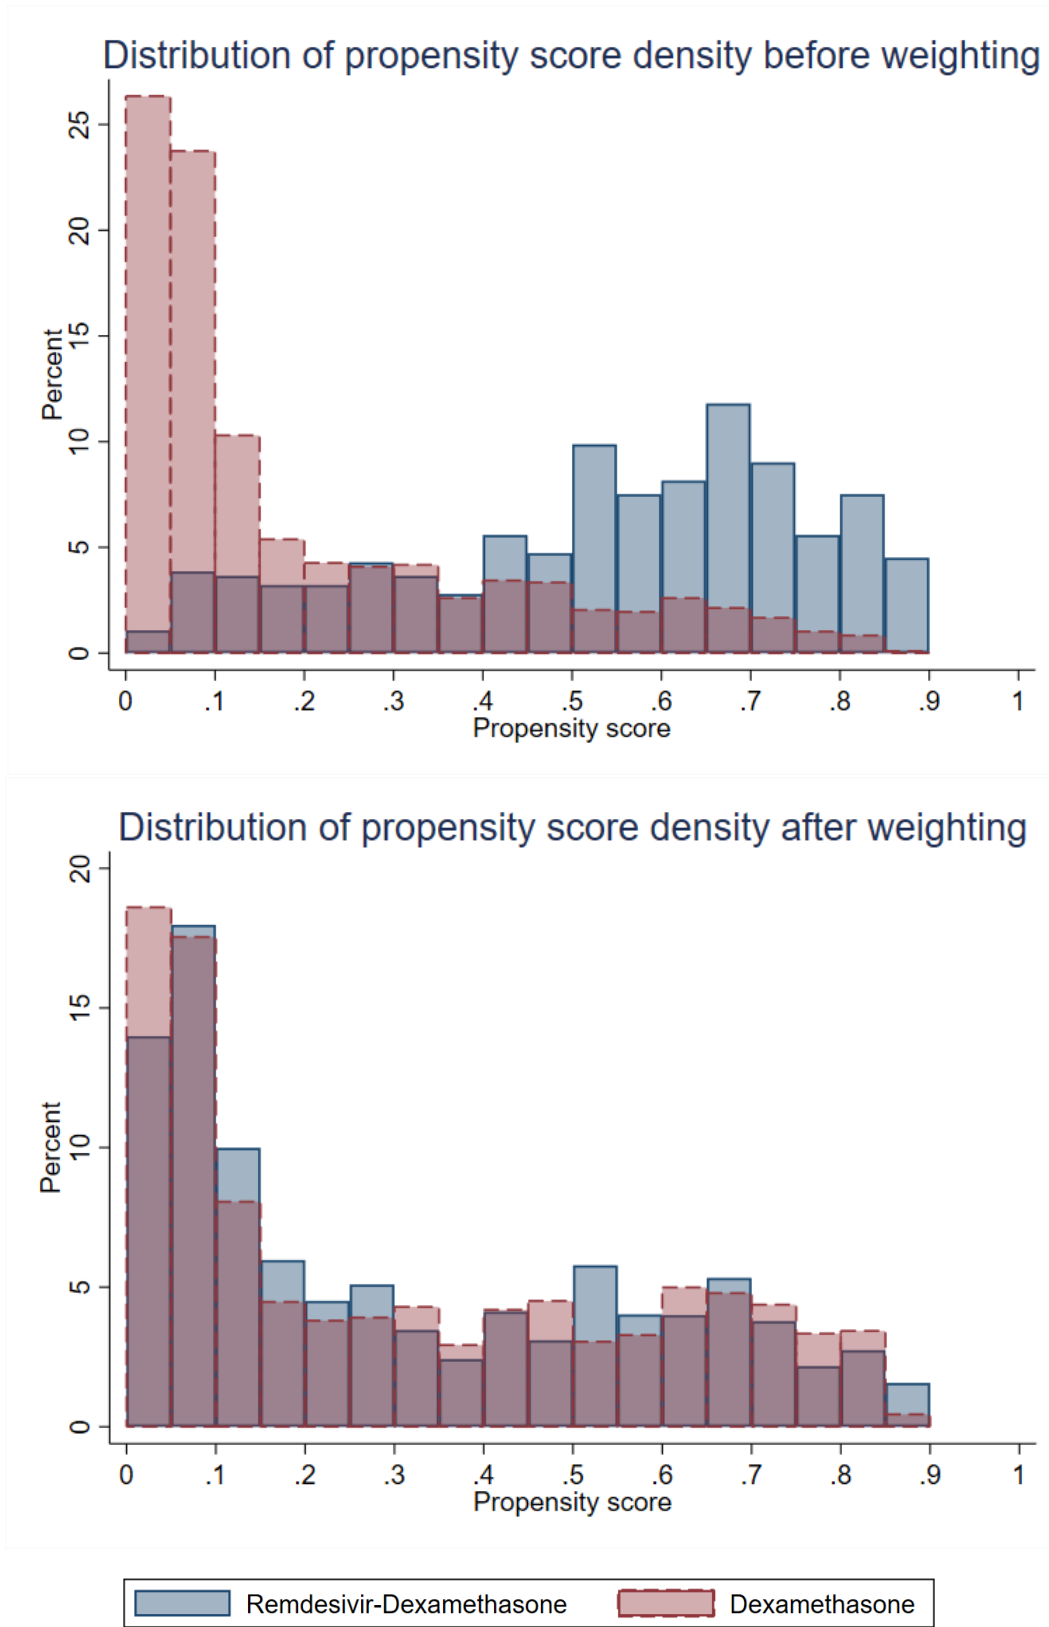

**Supplementary Figure 4. Comparison of changes in creatine kinase, total bilirubin, alkaline phosphatase (ALP), alanine transaminase (ALT), hemoglobin, and c-reactive protein (CRP) from baseline to the last measurement available during hospitalization between remdesivir-dexamethasone and dexamethasone groups**

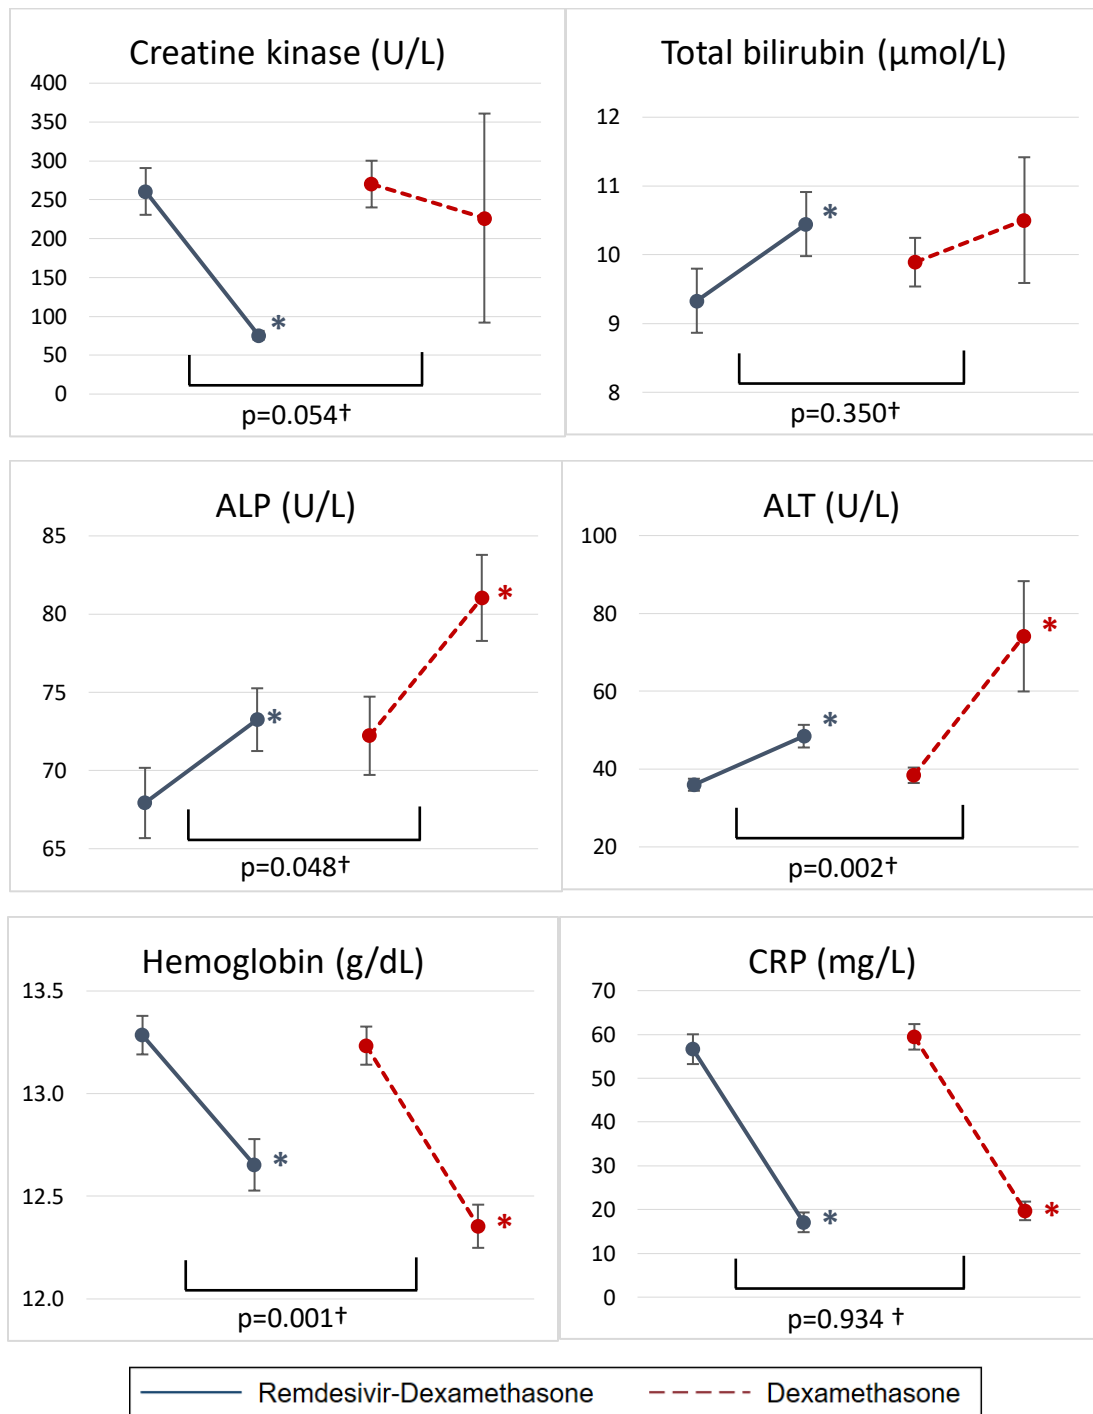

Notes: ALP = alkaline phosphatase; ALT = alanine transaminase; CRP = c-reactive protein

\* Significant difference (p < 0.05) in mean of change from baseline to the last measurement available during hospitalization within remdesivir-dexamethasone and dexamethasone groups by paired t-test

† P-values indicate differences in change from baseline to the last measurement available during hospitalization between remdesivir-dexamethasone and dexamethasone groups by linear regression
